# Supplementary material for: Effects of rifampin on the pharmacokinetics and pharmacodynamics of milvexian, a potent, selective, oral small molecule factor XIa inhibitor
Source: PubMed Central journal article supplement (PMC9789074; doi:10.1038/s41598-022-25936-2), 2022-12-23
Supplement: 41598_2022_25936_MOESM1_ESM.pdf [file 41598_2022_25936_MOESM1_ESM.pdf]

## **Supplementary Information**

### **Effects of rifampin on the pharmacokinetics and pharmacodynamics of milvexian, a potent, selective, oral small molecule factor XIa inhibitor**

Vidya Perera,<sup>1,\*</sup> Zhaoqing Wang,<sup>1</sup> Susan Lubin,<sup>1</sup> Lisa J. Christopher,<sup>1</sup> Wei Chen,<sup>1</sup> Sophia Xu,<sup>1</sup>  
Dietmar Seiffert,<sup>1</sup> Mary DeSouza,<sup>1</sup> Bindu Murthy<sup>1</sup>

<sup>1</sup>Bristol Myers Squibb, Princeton, NJ, USA.

**Supplemental Table S1. PK and PD sampling schedule**

| <b>Study day</b> | <b>Time<br/>(relative to<br/>milvexian dose);<br/>hour:min</b> | <b>PK blood sample</b> | <b>PD blood sample</b> |
|------------------|----------------------------------------------------------------|------------------------|------------------------|
| 1                | 00:00                                                          | X                      | X                      |
| 1                | 00:30                                                          | X                      | X                      |
| 1                | 1:00                                                           | X                      |                        |
| 1                | 2:00                                                           | X                      | X                      |
| 1                | 3:00                                                           | X                      | X                      |
| 1                | 4:00                                                           | X                      | X                      |
| 1                | 6:00                                                           | X                      |                        |
| 1                | 8:00                                                           | X                      | X                      |
| 1                | 10:00                                                          | X                      |                        |
| 1                | 12:00                                                          | X                      | X                      |
| 2                | 24:00                                                          | X                      | X                      |
| 2                | 36:00                                                          | X                      |                        |
| 3                | 48:00                                                          | X                      | X                      |
| 4                | 00:00                                                          | X                      | X                      |
| 4                | 00:30                                                          | X                      |                        |
| 4                | 1:00                                                           | X                      |                        |
| 4                | 2:00                                                           | X                      |                        |
| 4                | 3:00                                                           | X                      |                        |
| 4                | 4:00                                                           | X                      |                        |
| 4                | 6:00                                                           | X                      |                        |
| 4                | 8:00                                                           | X                      |                        |
| 4                | 10:00                                                          | X                      |                        |
| 4                | 12:00                                                          | X                      |                        |

|    |       |   |   |
|----|-------|---|---|
| 5  | 24:00 | X |   |
| 5  | 36:00 | X |   |
| 6  | 48:00 | X |   |
| 7  | 72:00 | X |   |
| 12 | 00:00 | X | X |
| 12 | 00:30 | X | X |
| 12 | 1:00  | X |   |
| 12 | 2:00  | X | X |
| 12 | 3:00  | X | X |
| 12 | 4:00  | X | X |
| 12 | 6:00  | X |   |
| 12 | 8:00  | X | X |
| 12 | 10:00 | X |   |
| 12 | 12:00 | X | X |
| 13 | 24:00 | X | X |
| 13 | 36:00 | X |   |
| 14 | 48:00 | X | X |
| 15 | 72:00 | X | X |

PK, pharmacokinetic; PD, pharmacodynamic.
